# Supplementary material
Source: PubMed Central journal article supplement (PMC6811454)
Supplement: AAC.00646-19-s0001.pdf [file AAC.00646-19-s0001.pdf]

1 **Supplementary data**

2 **Table S1: Primers used for the detection of antibiotic-resistance genes**

| PCR assay                                 | Target gene                  | Primer name                                   | Sequence (5'-3')                                 | Amplicon size (bp) | Reference |
|-------------------------------------------|------------------------------|-----------------------------------------------|--------------------------------------------------|--------------------|-----------|
| Multiplex PCR for CTX-M groups            | CTX-M group 1                | MultiCTXMGp1_for<br>MultiCTXMGp1-2_rev        | TTAGGAARTGTGCCGCTGYA<br>CGATATCGTTGGTGGTRCCAT    | 688                | (1)       |
|                                           | CTX-M group 2                | MultiCTXMGp2_for<br>MultiCTXMGp1-2_re         | CGTTAACGGCACGATGAC<br>CGATATCGTTGGTGGTRCCAT      | 404                |           |
|                                           | CTX-M group 9                | MultiCTXMGp9_for<br>MultiCTXMGp9_rev          | TCAAGCCTGCCGATCTGGT<br>TCAAGCCTGCCGATCTGGT       | 561                |           |
|                                           | CTX-M group 8/25             | CTX-Mg8/25_for<br>CTX-Mg8/25_re               | AACRCRCAGACGCTCTAC<br>TCGAGCCGGAASGTGYAT         | 326                |           |
| Multiplex PCR for TEM, SHV and OXA-1-like | TEM                          | MultiTSO-T_for<br>MultiTSO-T_rev              | CATTTCCGTGTCGCCCTTATTC<br>CGTTCATCCATAGTTGCCTGAC | 800                | (1)       |
|                                           | SHV                          | MultiTSO-S_for<br>MultiTSO-S_rev              | AGCCGCTTGAGCAAATTAAC<br>ATCCCGCAGATAAATCACCAC    | 713                |           |
|                                           | OXA-1-like (OXA-1, -4 & -30) | MultiTSO-O_for<br>MultiTSO-O_re               | GGCACCAGATTCAACTTTCAAG<br>GACCCCAAGTTTCTGTAAGTG  | 564                |           |
| Multiplex PCR for carbapenemases          | IMP                          | IMP_for<br>IMP_rev                            | GGAATAGAGTGGCTTAAYTCTC<br>GGTTTAAAYAAAACAACCACC  | 232                | (2)       |
|                                           | SPM                          | SPM_for<br>SPM_rev                            | AAAATCTGGGTACGCAAACG<br>ACATTATCCGCTGGAACAGG     | 271                |           |
|                                           | AIM                          | AIM_for<br>AIM_rev                            | CTGAAGGTGTACGAAACAC<br>GTTCCGGCCACCTCGAATTG      | 322                |           |
|                                           | VIM                          | VIM_for<br>VIM_rev                            | GATGGTGTGGTTCGCATA<br>CGAATGCGCAGCACCAG          | 390                |           |
|                                           | KPC                          | KPC_for<br>KPC_rev                            | CGTCTAGTTCTGCTGTCTTG<br>CTTGTATCCTTGTAGGCG       | 798                |           |
|                                           | GIM                          | GIM_for<br>GIM_rev                            | CGACACACCTTGGTCTGAA<br>AACTTCCAACCTTGCCATGC      | 477                |           |
|                                           | BIC                          | BIC_for<br>BIC_rev                            | TATGCAGCTCCTTTAAGGGC<br>TCATTGGCGGTGCCGTACAC     | 537                |           |
|                                           | SIM                          | SIM_for<br>SIM_rev                            | TACAAGGGATTGCGCATCG<br>TAATGGCCTGTTCCCATGTG      | 570                |           |
|                                           | OXA-48                       | OXA_for<br>OXA_rev                            | GCGTGGTTAAGGATGAACAC<br>CATCAAGTTCAACCAACCG      | 438                |           |
|                                           | NDM                          | NDM_for<br>NDM_rev                            | GGTTTGGCGATCTGGTTTTTC<br>CGGAATGGCTCATCACGATC    | 621                |           |
| DIM                                       | DIM_for<br>DIM_rev           | GCTTGTCTTCGCTTGTAAACG<br>CGTTCGGCTGGATTGATTTG | 699                                              |                    |           |
| Multiplex PCR 1 for PMQR                  | <i>qnrA</i>                  | <i>qnrA</i> _for<br><i>qnrA</i> _rev          | AGAGGATTTCTCACGCCAGG<br>TGCCAGGCACAGATCTTGAC     | 579                | (2)       |
|                                           | <i>qnrB</i>                  | <i>qnrB</i> _for<br><i>qnrB</i> _rev          | GGMATHGAAATTCGCCACTG<br>TTYGCBGYCCGAGTCGAA       | 263                |           |

|                                                     |                          |                                                    |                                                          |     |     |
|-----------------------------------------------------|--------------------------|----------------------------------------------------|----------------------------------------------------------|-----|-----|
|                                                     | <i>qnrS</i>              | <i>qnrS_for</i><br><i>qnrS_rev</i>                 | GCAAGTTCATTGAACAGGGT<br>TCTAAACCGTCGAGTTCGGCG            | 427 | (3) |
|                                                     | <i>qepA</i>              | <i>qepA_for</i><br><i>qepA_rev</i>                 | AACTGCTTGAGCCCGTAGAT<br>CGTGTGCTGGAGTTCCTCC              | 189 |     |
| <b>Multiplex PCR 2<br/>for PMQR</b>                 | <i>aac(6)-<br/>lb-cr</i> | <i>aac(6)-lb-cr_for</i><br><i>aac(6)-lb-cr_rev</i> | TTGGAAGCGGGGACGGAM<br>ACACGGCTGGACCATA                   | 264 |     |
|                                                     | <i>qnrC</i>              | <i>qnrC_for</i><br><i>qnrC_rev</i>                 | GGGTTGTACATTTATTGAATCG<br>CACCTACCCATTTATTTCA            | 308 |     |
|                                                     | <i>qnrD</i>              | <i>qnrD_for</i><br><i>qnrD_rev</i>                 | ATGGAAAAGCACTTTATCAA<br>TTATCGGTGAACAATAACAC             | 645 |     |
|                                                     | <i>oqxAB</i>             | <i>oqxAB_for</i><br><i>oqxAB_rev</i>               | GACGACAAAGCGGTACTIONGAC<br>GTCTCGGCAATCACTTTCGG          | 448 |     |
| <b>Multiplex PCR for<br/>16S rRNA<br/>methylase</b> | <i>rmtB</i>              | <i>rmtB_for</i><br><i>rmtB_rev</i>                 | GCT TTC TGC GGG CGA TGT AA<br>ATG CAA TGC CGC GCT CGT AT | 173 | (4) |
|                                                     | <i>rmtC</i>              | <i>rmtC_for</i><br><i>rmtC_rev</i>                 | CGA AGA AGT AAC AGC CAA AG<br>ATC CCA ACA TCT CTC CCA CT | 711 |     |
|                                                     | <i>armA</i>              | <i>armA_for</i><br><i>armA_rev</i>                 | ATT CTG CCT ATC CTA ATT GG<br>ACC TAT ACT TTA TCG TCG TC | 315 |     |

3

4

1 Dallenne C, Da Costa A, Decré D, Favier C, Arlet G. Development of a set of  
2 multiplex PCR assays for the detection of genes encoding important beta-lactamases  
3 in Enterobacteriaceae. J Antimicrob Chemother. 2010;65 :490-495.

5

6

2 Poirel L, Walsh TR, Cuvillier V et al. Multiplex PCR for detection of acquired  
3 carbapenemase genes. Diagn Microbiol Infect Dis. 2011;70: 119-23.

7

8

3 Rodriguez-Martinez J.M., Machuca J., Cano M.E., Calvo J., Martinez-Martinez L.,  
4 Pascual A. Plasmid-mediated quinolone resistance: Two decades on. Drug Resistance  
5 Updates. 2016;29:13-29.

9

10

11

4 Doi, Y., and Y. Arakawa. 16S ribosomal RNA methylation: emerging resistance  
5 mechanism against aminoglycosides. Clin. Infect. Dis 2007; 45:88-94.

12

13
